# Supplementary material
Source: Springer Nature journal article supplement (https://www.springermedizin.de/resource/supplementary/12943_2010_700_MOESM5_ESM.pdf/9554612)

Poor

Good

Stage

Age

Status

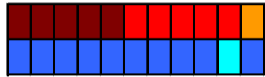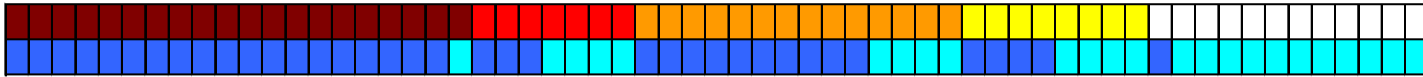

Stage:

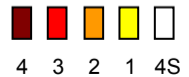

Age:

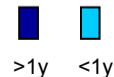

Status:

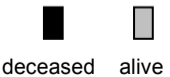

Supplement: MOESM5 [file 9554612]
